# Supplementary material
Source: publisher figshare collection journal article supplement (https://karger.figshare.com/ndownloader/files/28904142)
Supplement: Supplementary file 1 [file 28904142]

**Supplementary Figure 1**: 68-year-old woman with surgically proven benign cyst with inflammatory alterations in right kidney.

A and B, axial unenhanced (A) and contrast-enhanced (B) CT scans show a 10 cm cystic mass in inferior portion of right kidney with a few minimal-thickening septa.

C and D, gray-scale (C) and contrast-enhanced (D) sonographies show thickened enhancing septa at the upper part of cyst (arrows), classified Bosniak III.
